# Supplementary material
Source: PubMed Central journal article supplement (PMC4135648)
Supplement: JB.01961-14_zjb999093282so1.pdf [file JB.01961-14_zjb999093282so1.pdf]

## Supporting information

Acetyl-CoA synthetase is acetylated on multiple lysine residues by a protein acetyltransferase with single GNAT domain in *Saccharopolyspora erythraea*

### Supplemental figures

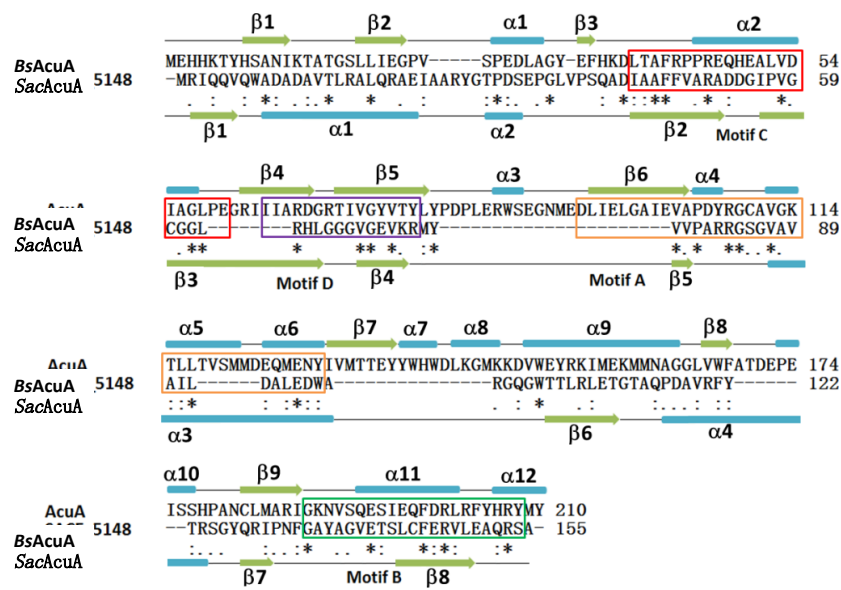

Figure S1. Sequence comparison between *BsAcuA* and *SacAcuA*. The conserved motifs, sequentially labeled C, D, A, and B were presented with boxes.

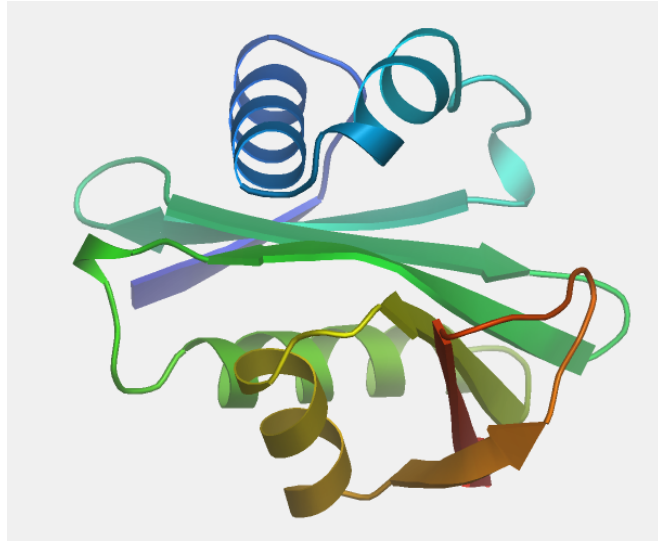

Figure S2. The structure model of SacAcuA was predicted using SWISS-MODEL Server of Protein Model Portal (PMP).

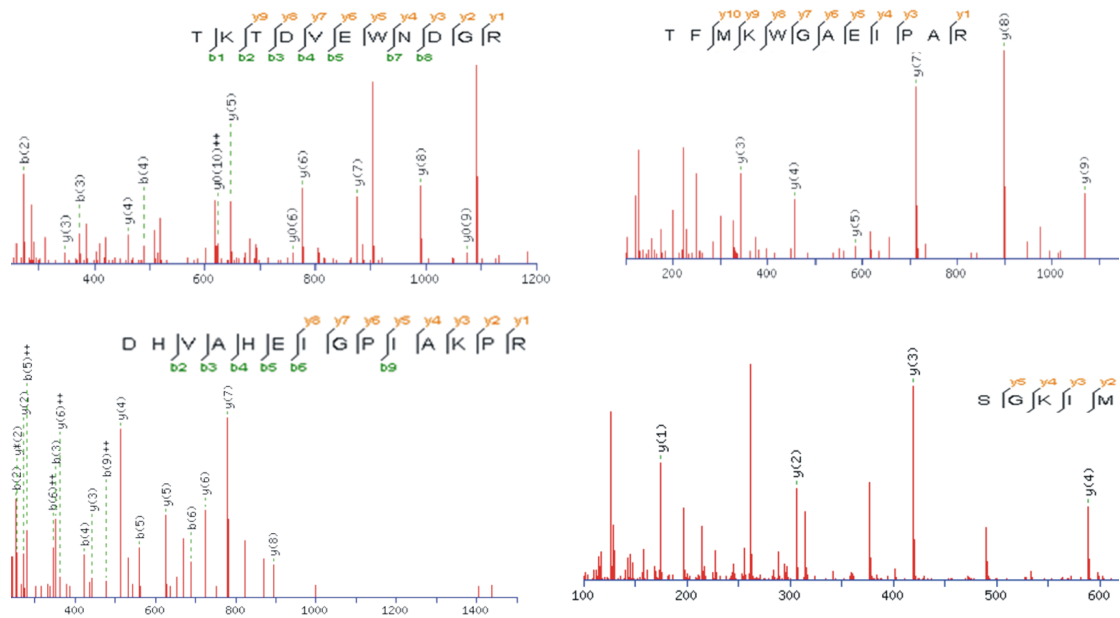

Figure S3. The MS/MS spectra of the acetylpeptides from *in vitro* acetylated SacAcuA protein by SacAcuA acetyltransferase.

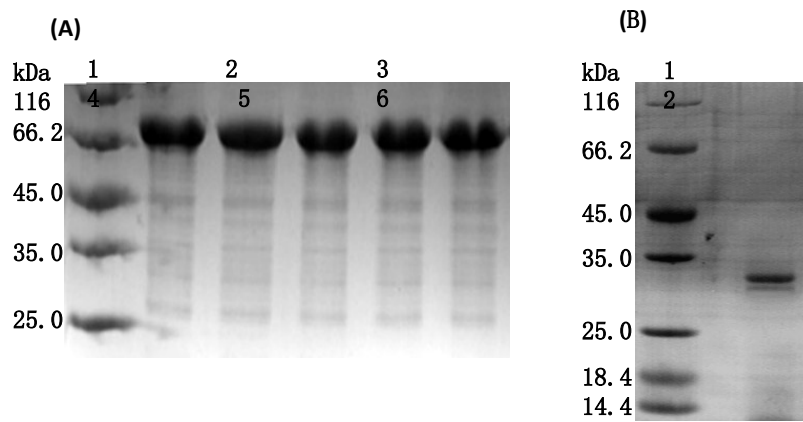

Figure. S4. SDS-PAGE analysis of purified recombinant proteins of *S. erythraea*. (A) Lane 1, the molecular mass marker; Lane 2, purified His-SacAcsA wild type; Lane 3, purified His-SacAcsA<sup>K237Q</sup>; Lane 4, purified His-SacAcsA<sup>K380Q</sup>; Lane 5, purified His-SacAcsA<sup>K611Q</sup>; Lane 6, purified His-SacAcsA<sup>K628Q</sup>. (B) Lane 1, the molecular mass marker; Lane 2, purified His-SacSrtN.





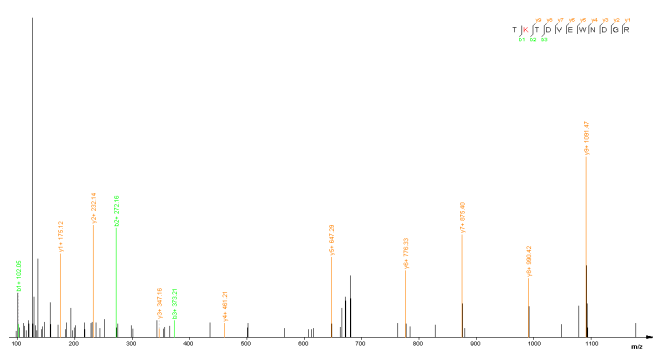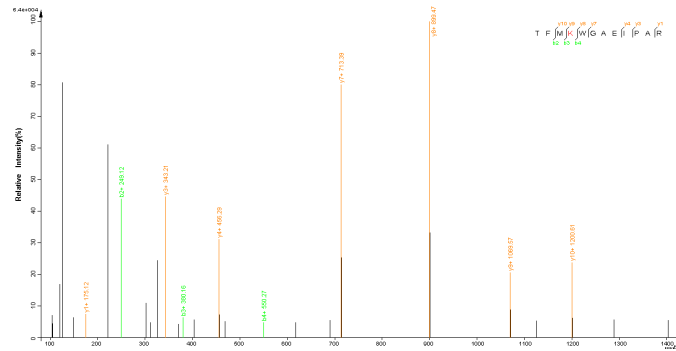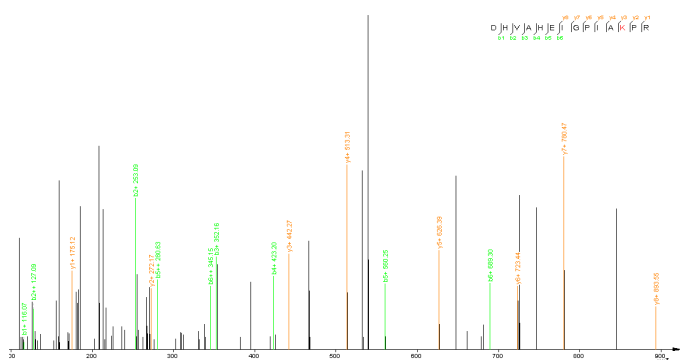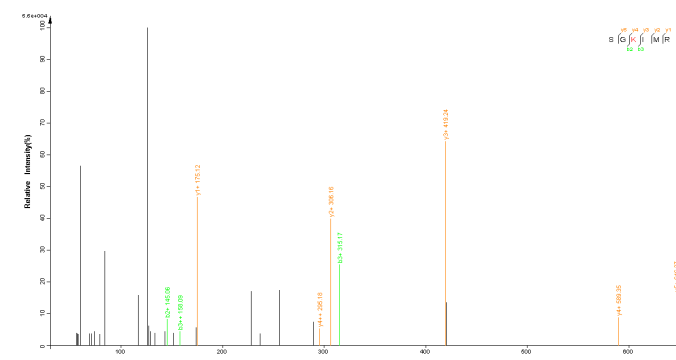

**Figure S7.** The MS/MS spectra of the acetylpeptides from the acetylated *SacAcS A* protein isolated from *S. erythraea* by immunoprecipitation.

**Table S1. Strains and plasmids used in this work**

| Strain or plasmid                                    | source or reference |
|------------------------------------------------------|---------------------|
| <b>strains</b>                                       |                     |
| <i>Salmonella enterica</i> , serovar Typhimurium LT2 | ATCC 700720         |
| <i>Bacillus subtilis</i> 168                         | ATCC 6051           |
| <i>Saccharopolyspora erythraea</i> NRRL2338          | DSM 40517           |
| <i>S. erythraea</i> YE3798 ( $\Delta$ SACE_3798)     | In this work        |
| <i>S. erythraea</i> YE5148 ( $\Delta$ SACE_5148)     | In this work        |
| <i>Salmonella enterica</i> $\Delta$ acs2 (JE7758)    | [1]                 |
| <b>plasmids</b>                                      |                     |
| pET-28a                                              | Thermo Scientific   |
| pGEX-4T-2                                            | Thermo Scientific   |
| pBAD30                                               | [2]                 |

1. **Starai VJ, Garrity J, Escalante-Semerena JC.** 2005. Acetate excretion during growth of *Salmonella enterica* on ethanolamine requires phosphotransacetylase (EutD) activity, and acetate recapture requires acetyl-CoA synthetase (Acs) and phosphotransacetylase (Pta) activities. *Microbiol.* **151**:3793-3801.
2. **Guzman LM, Belin D, Carson MJ, Beckwith J.** 1995. Tight regulation, modulation, and high-level expression by vectors containing the arabinose PBAD promoter. *J Bacteriol.* **177**:4121-4130, 4312.

**Table S2. Primers for overproduction of proteins**

| gene      | Primer sequence (5'-3')                                                               |
|-----------|---------------------------------------------------------------------------------------|
| sace_2375 | TAAGAATTCATGTCGTCAAACGCGTCGAGA<br>TATAAGCTTTCAGTCGTGCTGGAGGTGG                        |
| sace_3798 | TAAGAATTCTTGTTGCGCGCGGCC<br>TATAAGCTTTCAGGTCCATGTGCTGGGGTC                            |
| sace_5148 | TAAGAATTCATGAGGATCCAGCAGGTGCAGT<br>TATGTCGACTCAGGCGCTGCGTTGTGC                        |
| Bsu29680  | TAAGGATCCATGAACTTGAAAGCGTTACCAGCAA<br>TAAGAATTCTTAATCCTCCATTGTTGACAGATCTCCA           |
| Bsu29690  | TAAGGATCCGTGGAACATCATAAAACATAACCATTGAGC<br>TAAGAATTCTTAATACATATAACGATGATAAAAACGGAGCCT |
| STM4275   | TAAGGATCCATGAGCCAAACACATAAACACGCCA<br>TAAGAATTCTTATGACGGCATCGCGATGGC                  |
| STM2651   | TAAGGATCCATGAGCCAGCAAGGACTGGAAG<br>TAACCGGGTCACGATTCATCACATTTGGCCA                    |

**Table S3. Primers for constructing acetylated-site mutants of SacAcs.**

| Oligonucleotides | Sequences (5'-3')              |
|------------------|--------------------------------|
| K237QA           | CGTCCAACGCACCCAGACCGACGTGGA    |
| K237QB           | TCCACGTCGGTCTGGGTGCGTTGGACG    |
| K380QA           | CCATCCGCACCTTCATGCAATGGGGCGCGG |
| K380QB           | CCGCGCCCCATTGCATGAAGGTGCGGATGG |
| K611QA           | GCCCCATCGCCCAACCCCGCCAG        |
| K611QB           | CTGGCGGGGTTGGGCGATGGGGC        |
| K628QA           | CAAACCCGCTCCGGCCAGATCATGCG     |
| K628QB           | GGCCGGAGCGGGTTTTGGGCAGTTC      |
